# Supplementary material for: Insights into Circular Horticulture: Knowledge Diffusion, Resource Circulation, One Health Approach, and Greenhouse Technologies
Source: MDPI journal article supplement (doi:10.3390/ijerph191912053), 2022-09-23
Supplement: s1 [file s1]

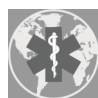

# Insights into Circular Horticulture: Knowledge Diffusion, Resource Circulation, One Health Approach, and Greenhouse Technologies

Diego Alejandro Salinas-Velandia, Felipe Romero-Perdomo, Stephanie Numa-Vergel, Edwin Villagrán, Pilar Donado-Godoy and Julio Ricardo Galindo-Pacheco

## Supplementary Materials

**Table S1.** Publications on circular horticulture that were analyzed with the evaluation framework of bibliometric and text mining.

| Title                                                                                                                                              | Authors                                                                                                     | Year | Journal                                        | Country   |
|----------------------------------------------------------------------------------------------------------------------------------------------------|-------------------------------------------------------------------------------------------------------------|------|------------------------------------------------|-----------|
| Exploring the agricultural reutilisation of desalination reject brine from reverse osmosis technology                                              | Jiménez-Arias, D., Sierra, S. M., García-Machado, F. J., García-García, A. L., Borges, A. A., & Luis, J. C. | 2022 | Desalination                                   | Spain     |
| Biochar for intensification of plant-related industries to meet productivity, sustainability and economic goals: A review                          | Kochanek, J., Soo, R. M., Martinez, C., Dakuidreketi, A., & Mudge, A. M.                                    | 2022 | Resources, Conservation and Recycling          | Australia |
| How decentralized treatment can contribute to the symbiosis between environmental protection and resource recovery                                 | Estévez, S., González-García, S., Feijoo, G., & Moreira, M. T.                                              | 2022 | Science of the Total Environment               | Spain     |
| Biodisinfection as a profitable fertilization method for horticultural crops in the framework of the circular economy                              | Castillo-Díaz, F. J., Belmonte-Ureña, L. J., Camacho-Ferre, F., & Tello Marquina, J. C.                     | 2022 | Agronomy                                       | Spain     |
| Peaches detection using a deep learning technique—A contribution to yield estimation, resources management, and circular economy                   | Assunção, E. T., Gaspar, P. D., Mesquita, R. J., Simões, M. P., Ramos, A., Proença, H., & Inacio, P. R.     | 2022 | Climate                                        | Portugal  |
| Biorefining within food loss and waste frameworks: a review                                                                                        | Jones, R. E., Speight, R. E., Blinco, J. L., & O'Hara, I. M.                                                | 2022 | Renewable and Sustainable Energy Reviews       | Australia |
| Review of the potential for recycling CO <sub>2</sub> from organic waste composting into plant production under controlled environment agriculture | Thomson, A., Price, G. W., Arnold, P., Dixon, M., & Graham, T.                                              | 2021 | Journal of Cleaner Production                  | Canada    |
| The effect of phosgreen fertilization on the growth and phosphorus uptake of lettuce ( <i>Lactuca sativa</i> )                                     | Jama-Rodzeńska, A.                                                                                          | 2022 | International Journal of Agriculture & Biology | Poland    |

|                                                                                                                                                                                                                                                                                       |                                                                                                             |      |                                              |                             |
|---------------------------------------------------------------------------------------------------------------------------------------------------------------------------------------------------------------------------------------------------------------------------------------|-------------------------------------------------------------------------------------------------------------|------|----------------------------------------------|-----------------------------|
| Biofertilizers and biostimulants for agricultural and aquaculture use: bioprocesses applied to organic by-products of the fishing industry [bi-fertilizantes y bioestimulantes para uso agrícola y acuícola: bioprocesos aplicados a subproductos orgánicos de la industria pesquera] | Florez-Jalixto, M., Roldán-Acero, D., Omote-Sibina, J. R., & Molleda-Ordoñez, A.                            | 2021 | Scientia Agropecuaria                        | Peru                        |
| Bioactive modified non-wovens as a novel approach of plants protection against invasive slugs                                                                                                                                                                                         | Rosowski, M., Puchowicz, D., Jaskulska, M., Kozłowski, J., & Cieślak, M.                                    | 2021 | Materials                                    | Poland                      |
| Use of recovered struvite and ammonium nitrate in fertigation in tomato ( <i>Lycopersicum esculentum</i> ) production for boosting circular and sustainable horticulture                                                                                                              | Carreras-Sempere, M., Caceres, R., Viñas, M., & Biel, C.                                                    | 2021 | Agriculture                                  | Spain                       |
| Evaluating recycling fertilizers for tomato cultivation in hydroponics, and their impact on greenhouse gas emissions                                                                                                                                                                  | Halbert-Howard, A., Häfner, F., Karlowsky, S., Schwarz, D., & Krause, A.                                    | 2021 | Environmental Science and Pollution Research | Germany                     |
| Low-temperature hydrothermally treated eucalyptus globulus bark: from by-product to horticultural fiber-based growing media viability                                                                                                                                                 | Chemetova, C., Mota, D., Fabião, A., Gominho, J., & Ribeiro, H.                                             | 2021 | Journal of Cleaner Production                | Netherlands, Portugal       |
| Significance and vision of nutrient recovery for sustainable city food systems in Germany by 2050                                                                                                                                                                                     | Jiménez-Arias, D., Sierra, S. M., García-Machado, F. J., García-García, A. L., Borges, A. A., & Luis, J. C. | 2022 | Desalination                                 | Spain                       |
| Reuse of the spent mushroom substrate in a vegetable seedbed [reutilización del sustrato post-cultivo de hongos en semillero de hortalizas]                                                                                                                                           | Yague-Carrasco, M. R., & Carmen Lobo, M.                                                                    | 2021 | ITEA—Informacion Tecnica Economica Agraria   | Spain                       |
| Phosphorus recovery from sewage sludge ash based on cradle-to-cradle approach—mini-review                                                                                                                                                                                             | Jama-Rodzeńska, A., Sowiński, J., Koziel, J. A., & Białowiec, A.                                            | 2021 | Minerals                                     | Poland, USA                 |
| Gasification biochar from horticultural waste: an exemplar of the circular economy in Singapore                                                                                                                                                                                       | Arora, S., Jung, J., Liu, M., Li, X., Goel, A., Chen, J., ... & Wang, C. H.                                 | 2021 | Science of The Total Environment             | Singapore, China, Australia |
| Innovative strategy to reduce single-use plastics in sustainable horticulture by a refund strategy for flowerpots                                                                                                                                                                     | Blanke, M. M., & Golombek, S. D.                                                                            | 2021 | Sustainability                               | Germany                     |
| The role of peat-free organic substrates in the sustainable management of soilless cultivations                                                                                                                                                                                       | Atzori, G., Pane, C., Zaccardelli, M., Cacini, S., & Massa, D.                                              | 2021 | Agronomy                                     | Italy                       |
| Chemically versus thermally processed brown shrimp shells or chinese mitten crab as a source of chitin, nutrients or salts and as microbial stimulant in soilless strawberry cultivation                                                                                              | Vandecasteele, B., Amery, F., Ommeslag, S., Vanhoutte, K., Visser, R., Robbens, J., ... & Debode, J.        | 2021 | Science of the Total Environment             | Belgium, The Netherlands    |

|                                                                                                                                                                 |                                                                                                    |      |                                                  |                                                             |
|-----------------------------------------------------------------------------------------------------------------------------------------------------------------|----------------------------------------------------------------------------------------------------|------|--------------------------------------------------|-------------------------------------------------------------|
| The evolution of soilless systems towards ecological sustainability in the perspective of a circular economy. Is it really the opposite of organic agriculture? | Gonnella, M., & Renna, M.                                                                          | 2021 | Agronomy                                         | Italy                                                       |
| Biochar for circular horticulture: feedstock related effects in soilless cultivation                                                                            | Amery, F., Debode, J., Ommeslag, S., Visser, R., De Tender, C., & Vandecasteele, B.                | 2021 | Agronomy                                         | Belgium, The Netherlands,                                   |
| The role of biotechnology in the transition from plastics to bioplastics: an opportunity to reconnect global growth with sustainability                         | Degli Esposti, M., Morselli, D., Fava, F., Bertin, L., Cavani, F., Viaggi, D., & Fabbri, P.        | 2021 | FEBS Open Bio                                    | Italy                                                       |
| Bioeconomy as a transforming driver of intensive greenhouse horticulture in Spain                                                                               | Egea, F. J., López-Rodríguez, M. D., Oña-Burgos, P., Castro, A. J., & Glass, C. R.                 | 2021 | New Biotechnology                                | Spain, USA, United Kingdom                                  |
| Cattle horn shavings: a possible nitrogen source for apple trees                                                                                                | Lanauskas, J., Uselis, N., Buskienė, L., Mažeika, R., Staugaitis, G., & Kviklys, D.                | 2021 | Agronomy                                         | Lithuania, Norway, Singapore, Australia, South Korea, China |
| Biochar industry to circular economy                                                                                                                            | Hu, Q., Jung, J., Chen, D., Leong, K., Song, S., Li, F., ... & Wang, C. H.                         | 2021 | Science of the Total Environment                 | United Kingdom                                              |
| Increasing city resilience through urban agriculture: challenges and solutions in the global north                                                              | Gulyas, B. Z., & Edmondson, J. L.                                                                  | 2021 | Sustainability                                   | Portugal                                                    |
| Horticulture and orchards as new markets for manure valorisation with less environmental impacts                                                                | Fangueiro, D., Alvarenga, P., & Fragoso, R.                                                        | 2021 | Sustainability                                   | Italy                                                       |
| Aqueous extracts and residual biomass use in sustainable agriculture: a circular economy model                                                                  | Beni, C., Rinaldi, S., Masciarelli, E., Di Luigi, M., Casorri, L., & Neri, U.                      | 2021 | Environmental Engineering and Management Journal | India, Canada                                               |
| Recent advances in extraction technologies for recovery of bioactive compounds derived from fruit and vegetable waste peels: a review                           | Rifna, E. J., Misra, N. N., & Dwivedi, M.                                                          | 2021 | Critical Reviews in Food Science and Nutrition   | Italy                                                       |
| Calcium phosphate particles coated with humic substances: a potential plant biostimulant from circular economy                                                  | Adamiano, A., Fellet, G., Vuerich, M., Scarpin, D., Carella, F., Piccirillo, C., ... & Iafisco, M. | 2021 | Molecules                                        | Italy                                                       |
| Strawberry fields forever: that is, how many grams of plastics are used to grow a strawberry?                                                                   | Galati, A., Sabatino, L., Prinzi-valli, C. S., D'Anna, F., & Scallenghe, R.                        | 2020 | Journal of Environmental Management              | Italy                                                       |
| Grow–store–steam–repeat: reuse of spent growing media for circular cultivation of chrysanthemum                                                                 | Vandecasteele, B., Blindeman, L., Amery, F., Pieters, C.,                                          | 2020 | Journal of Cleaner Production                    | Belgium                                                     |

|                                                                                                                                                                                                                              |                                                                                                      |      |                                     |                                                                    |
|------------------------------------------------------------------------------------------------------------------------------------------------------------------------------------------------------------------------------|------------------------------------------------------------------------------------------------------|------|-------------------------------------|--------------------------------------------------------------------|
|                                                                                                                                                                                                                              | Ommeslag, S., Van Loo, K., ... & Deboe, J.                                                           |      |                                     |                                                                    |
| What horticulture and space exploration can learn from each other: the mission to mars initiative in The Netherlands                                                                                                         | Vermeulen, A. C., Hubers, C., de Vries, L., & Brazier, F.                                            | 2020 | Acta Astronautica                   | The Netherlands                                                    |
| Minimizing water and nutrient losses from soil-less cropping in Southern Europe                                                                                                                                              | Massa, D., Magán, J. J., Montesano, F. F., & Tzortzakis, N.                                          | 2020 | Agricultural water management       | Italy, Spain, Cyprus                                               |
| Agricultural waste recycling in horticultural intensive farming systems by on-farm composting and compost-based tea application improves soil quality and plant health: a review under the perspective of a circular economy | De Corato, U.                                                                                        | 2020 | Science of the Total Environment    | Italy                                                              |
| Identification of opportunities for applying the circular economy to intensive agriculture in Almería (South-East Spain)                                                                                                     | Aznar-Sánchez, J. A., Velasco-Muñoz, J. F., García-Arca, D., & López-Felices, B.                     | 2020 | Agronomy                            | Spain                                                              |
| Boosting leaf contents of rutin and solanesol in bio-waste of <i>Solanum lycopersicum</i>                                                                                                                                    | Röhlen-Schmittgen, S., Ellenberger, J., Groher, T., & Hunsche, M.                                    | 2020 | Plant Physiology and Biochemistry   | Germany, Switzerland                                               |
| Biodegradable raffia as a sustainable and cost-effective alternative to improve the management of agricultural waste biomass                                                                                                 | Duque-Acevedo, M., Belmonte-Ureña, L. J., Toresano-Sánchez, F., & Camacho-Ferre, F.                  | 2020 | Agronomy                            | Spain                                                              |
| Optimization of high-pressure extraction process of antioxidant compounds from feteasca regala leaves using response surface methodology                                                                                     | Becze, A., Babalau-Fuss, V. L., Varaticeanu, C., & Roman, C.                                         | 2020 | Molecules                           | Romania                                                            |
| Fish and fish waste-based fertilizers in organic farming—with status in norway: a review                                                                                                                                     | Ahuja, I., Dauksas, E., Remme, J. F., Richardsen, R., & Løes, A. K.                                  | 2020 | Waste Management                    | Norway                                                             |
| Public policies for sustainability and water security: the case of Almeria (Spain)                                                                                                                                           | Caparrós-Martínez, J. L., Rueda-López, N., Milán-García, J., & de Pablo Valenciano, J.               | 2020 | Global Ecology and Conservation     | Spain                                                              |
| Storage, fertilization and cost properties highlight the potential of dried microbial biomass as organic fertilizer                                                                                                          | Spanoghe, J., Grunert, O., Wambacq, E., Sakarika, M., Papini, G., Alloul, A., ... & Vlaeminck, S. E. | 2020 | Microbial biotechnology             | Belgium                                                            |
| Management of poultry manure in Poland—current state and future perspectives                                                                                                                                                 | Drózd, D., Wystalska, K., Malińska, K., Grosser, A., Grobelak, A., & Kacprzak, M.                    | 2020 | Journal of Environmental Management | Poland                                                             |
| A new network for the advancement of marine biotechnology in Europe and Beyond                                                                                                                                               | Rotter, A., Bacu, A., Barbier, M., Bertoni, F., Bones, A. M., Cancelli, M. L., ... & Vasquez, M. I.  | 2020 | Frontiers in marine science         | Slovenia, Albania, France, Switzerland, Norway, Portugal, Ireland, |

|                                                                                                                                                                                 |                                                                                                                  |      |                               |                                                   |                                                                                                                                                                                                                                                                                            |
|---------------------------------------------------------------------------------------------------------------------------------------------------------------------------------|------------------------------------------------------------------------------------------------------------------|------|-------------------------------|---------------------------------------------------|--------------------------------------------------------------------------------------------------------------------------------------------------------------------------------------------------------------------------------------------------------------------------------------------|
|                                                                                                                                                                                 |                                                                                                                  |      |                               |                                                   | Poland,<br>Turkey,<br>Greece,<br>Monte-<br>negro,<br>Latvia,<br>Iceland,<br>Israel, It-<br>aly, Cro-<br>atia,<br>Lithua-<br>nia, Esto-<br>nia,<br>Malta,<br>Den-<br>mark,<br>United<br>King-<br>dom,<br>Ger-<br>many,<br>Spain,<br>Belgium,<br>Slovenia,<br>Czechia,<br>Estonia,<br>Cyprus |
| Upcycling phosphorus recovered from anaerobically digested dairy manure to support production of vegetables and flowers                                                         | Porterfield, K. K., Joblin, R., Nehler, D. A., Curtis, M., Dvorak, S., Rizzo, D. M., ... & Roy, E. D.            | 2020 | Sustainability                | USA                                               |                                                                                                                                                                                                                                                                                            |
| Production of spinach in intensive mediterranean horticultural systems can be sustained by organic-based fertilizers without yield penalties and with low environmental impacts | Vico, A., Sáez, J. A., Pérez-Murcia, M. D., Martínez-Tomé, J., Andreu-Rodríguez, J., Agulló, E., ... & Moral, R. | 2020 | Agricultural Systems          | Spain                                             |                                                                                                                                                                                                                                                                                            |
| The management of agricultural waste biomass in the framework of circular economy and bioeconomy: an opportunity for greenhouse agriculture in Southeast Spain                  | Duque-Acevedo, M., Belmonte-Ureña, L. J., Plaza-Úbeda, J. A., & Camacho-Ferre, F.                                | 2020 | Agronomy                      | Spain                                             |                                                                                                                                                                                                                                                                                            |
| Cotton and cardoon byproducts as potential growing media components for <i>Cichorium spinosum</i> L. commercial cultivation                                                     | Petropoulos, S., Fernandes, Â., Stojković, D., Pereira, C., Taofiq, O., Di Gioia, F., ... & Ferreira, I. C.      | 2019 | Journal of Cleaner Production | Greece,<br>Portugal,<br>Serbia,<br>USA,<br>Cyprus |                                                                                                                                                                                                                                                                                            |
| Exploring the environmental performance of urban symbiosis for vertical hydroponic farming                                                                                      | Martin, M., Poulikidou, S., & Molin, E.                                                                          | 2019 | Sustainability                | Sweden                                            |                                                                                                                                                                                                                                                                                            |
| A horticultural medium established from the rapid removal of phytotoxins from winery grape marc                                                                                 | Olejar, K. J., Vandermeer, C., Fedrizzi, B., & Kilmartin, P. A.                                                  | 2019 | Horticulturae                 | New Zealand                                       |                                                                                                                                                                                                                                                                                            |

|                                                                                                                                                                               |                                                                                                                                                           |      |                                                                   |                          |
|-------------------------------------------------------------------------------------------------------------------------------------------------------------------------------|-----------------------------------------------------------------------------------------------------------------------------------------------------------|------|-------------------------------------------------------------------|--------------------------|
| Market-based tools for a plastic waste reduction policy in agriculture: a case study in the south of Italy                                                                    | De Lucia, C., & Pazienza, P.                                                                                                                              | 2019 | Journal of Environmental Management                               | Italy                    |
| Six collective challenges for sustainability of Almería greenhouse horticulture                                                                                               | Castro, A. J., López-Rodríguez, M. D., Giagnocavo, C., Gimenez, M., Céspedes, L., La Calle, A., ... & Valera, D. L.                                       | 2019 | International journal of environmental research and public health | Spain, USA               |
| Influence of supplementary led lighting on physiological and biochemical parameters of tomato ( <i>Solanum lycopersicum</i> L.) leaves                                        | Groher, T., Röhlen-Schmittgen, S., Fiebig, A., Noga, G., & Hunsche, M.                                                                                    | 2019 | Scientia Horticulturae                                            | Germany                  |
| Circular agri-food approaches: will consumers buy novel products made from vegetable waste?                                                                                   | McCarthy, B., Kapetanaki, A. B., & Wang, P.                                                                                                               | 2019 | Rural Society                                                     | Australia, UK, Singapore |
| Inorganic waste management in greenhouse agriculture in Almería (Spain): towards a circular system in intensive horticultural production                                      | Sayadi-Gmada, S., Rodríguez-Pleguezuelo, C. R., Rojas-Serrano, F., Parra-López, C., Parra-Gómez, S., García-García, M. D. C., ... & Manrique-Gordillo, T. | 2019 | Sustainability                                                    | Spain                    |
| Plant fibers for renewable growing media: potential of defibration, acidification or inoculation with biocontrol fungi to reduce the draw-down and plant pathogens            | Vandecasteele, B., Muylle, H., De Windt, I., Van Acker, J., Ameloot, N., Moreaux, K., ... & Debode, J.                                                    | 2018 | Journal of Cleaner Production                                     | Belgium                  |
| Microbiota from 'next-generation green compost' improves suppressiveness of composted municipal-solid-waste to soil-borne plant pathogens                                     | De Corato, U., Salimbeni, R., De Pretis, A., Patruno, L., Avella, N., Lacolla, G., & Cucci, G.                                                            | 2018 | Biological Control                                                | Italy                    |
| Recycling of P and K in circular horticulture through compost application in sustainable growing media for fertigated strawberry cultivation                                  | Vandecasteele, B., Debode, J., Willekens, K., & Van Delm, T.                                                                                              | 2018 | European Journal of Agronomy                                      | Belgium                  |
| The energy & raw materials factory: role and potential contribution to the circular economy of The Netherlands                                                                | van Leeuwen, K., de Vries, E., Koop, S., & Roest, K.                                                                                                      | 2018 | Environmental management                                          | The Netherlands          |
| An efficient agro-industrial complex in almería (Spain): towards an integrated and sustainable bioeconomy model                                                               | Egea, F. J., Torrente, R. G., & Aguilar, A.                                                                                                               | 2018 | New biotechnology                                                 | Spain, Belgium           |
| Effectiveness of a full-scale horizontal slow sand filter for controlling phytopathogens in recirculating hydroponics: from microbial isolation to full microbiome assessment | Prenafeta-Boldú, F. X., Trillas, I., Viñas, M., Guivernau, M., Cáceres, R., & Marfà, O.                                                                   | 2018 | Science of the Total Environment                                  | Spain                    |
| Circular economy and economic viability of aquaponic systems: comparing urban, rural and peri-urban scenarios under dutch conditions                                          | Stadler, M. M., Baganz, D., Vermeulen, T., & Keesman, K. J.                                                                                               | 2015 | Acta Horticulturae                                                | The Netherlands          |
| Farmer perceptions and use of organic waste products as fertilisers—a survey study of potential benefits and barriers                                                         | Case, S. D. C., Oelofse, M., Hou, Y., Oenema, O., & Jensen, L. S.                                                                                         | 2017 | Agricultural Systems                                              | Denmark, The             |

Nether-  
lands

**Table S2.** Text mining analysis search strategy.

| Major Topics                    | Minor Topics          | Search Equations                                                                                                                                                                                                                                                                                                                                                                        |
|---------------------------------|-----------------------|-----------------------------------------------------------------------------------------------------------------------------------------------------------------------------------------------------------------------------------------------------------------------------------------------------------------------------------------------------------------------------------------|
| Crops                           | Vegetables            | (Vegetable* OR Cabbage OR Tomato OR Onion OR Eggplant OR Carrot OR Cauliflower OR Kale OR Cucumber OR Garlic OR Leek OR Lettuce OR Spinach OR Beans OR Cowpeas OR Pumpkin OR “field peas” OR Aubergine OR Chili OR “Diplotaxis tenuifolia” OR “Valerianella locusta”)                                                                                                                   |
|                                 | Fruits                | (Fruit* OR Strawberry OR “passion fruit” OR papaya OR jackfruit OR citrus OR pineapple OR apple OR mango OR avocado OR “apple banana” OR bogoya OR watermelon OR guava OR grape OR melon)                                                                                                                                                                                               |
|                                 | Aromatic plants       | (aromatic OR “green pepper” OR “sweet pepper” OR “hot pepper” OR vanilla OR ginger OR turmeric OR marigold)                                                                                                                                                                                                                                                                             |
|                                 | Ornamental plants     | (Amaranthus OR Rose OR chrysanthemum OR poinsettia OR gerberas OR pansy)                                                                                                                                                                                                                                                                                                                |
| Resource Circulation Strategies | Biowaste              | (“animal waste” OR “poultry manure” OR “cattle horn shavings” OR “chinese mitten crab” OR “chicken manure” OR “livestock manure” OR “animal manure” OR “duck feces” OR “sheep dung” OR “pig manure” OR “goat manure” OR “cattle manure” OR “food waste” OR compost OR *compost* OR “residual biomass” OR “organic waste” OR “reused plant debris” OR “fiber material”)                  |
|                                 | Water                 | (Water OR wastewater OR “reverse osmosis” OR seawater OR desalination OR fertigation OR rainwater OR “soaker hoses” or “water overuse” OR “water use efficiency”)                                                                                                                                                                                                                       |
|                                 | One Health            | (“public health” OR Salmonella OR Campylobacter OR Klebsiella OR “Antimicrobial Resistance” OR “Whole-Genome Sequencing” “Global Health” OR Epidemiology OR “Pathogen Surveillance” OR Pathogen OR “Genomic Surveillance” OR “Escherichia coli” OR Enterococcus OR “One health” OR “food safety” OR Enterobacteriaceae OR “animal welfare” OR “human health” OR “environmental health”) |
| Greenhouse technologies         | Sensing technologies  | (“remote sensing” OR “precision agriculture” OR “machine learning” OR “nanotechnology” OR “controlled environment agriculture” OR “microclimate” OR “numerical simulation”)                                                                                                                                                                                                             |
|                                 | Sustainable materials | (“bioplastics” OR “plastic waste” OR “plastic remains” OR “debris plastic” OR “recycle plastic material” OR “sustainable material” OR biopolymer)                                                                                                                                                                                                                                       |



Bioenergy (“anaerobic digestion” OR biomass OR biorefinery OR biogas OR biofuels OR “renewable energy” OR biochar OR pyrolysis OR biomethane OR charcoal OR Biorefining OR biorefineries OR “wind power” OR agrivoltaic OR “Solar energy” OR “Solar panel” OR “sustainable energy” OR microalgae OR Hydropower OR “Hydraulic energy”)

**Table S3.** Top 10 most cited publications on circular horticulture.

| Rank | Document Title                                                                                                                                                                                                               | Number of Citations |
|------|------------------------------------------------------------------------------------------------------------------------------------------------------------------------------------------------------------------------------|---------------------|
| 1    | Farmer perceptions and use of organic waste products as fertilisers—A survey study of potential benefits and barriers                                                                                                        | 61                  |
| 2    | Agricultural waste recycling in horticultural intensive farming systems by on-farm composting and compost-based tea application improves soil quality and plant health: A review under the perspective of a circular economy | 57                  |
| 3    | The Energy & Raw Materials Factory: Role and Potential Contribution to the Circular Economy of the Netherlands                                                                                                               | 49                  |
| 4    | Management of poultry manure in Poland—Current state and future perspectives                                                                                                                                                 | 45                  |
| 5    | An efficient agro-industrial complex in Almería (Spain): Towards an integrated and sustainable bioeconomy model                                                                                                              | 38                  |
| 6    | The Management of Agricultural Waste Biomass in the Framework of Circular Economy and Bioeconomy: An Opportunity for Greenhouse Agriculture in Southeast Spain                                                               | 30                  |
| 7    | Minimizing water and nutrient losses from soilless cropping in southern Europe                                                                                                                                               | 28                  |
| 8    | Biochar Industry to Circular Economy                                                                                                                                                                                         | 26                  |
| 9    | Six Collective Challenges for Sustainability of Almería Greenhouse Horticulture                                                                                                                                              | 24                  |
| 10   | Plant fibers for renewable growing media: Potential of defibration, acidification or inoculation with biocontrol fungi to reduce the N drawdown and plant pathogens                                                          | 23                  |
